# Supplementary material for: Pheromones of three ambrosia beetles in the Euwallacea fornicatus species complex: ratios and preferences
Source: PeerJ. 2017 Oct 23;5:e3957. doi: 10.7717/peerj.3957 (PMC5657418; doi:10.7717/peerj.3957)
Supplement: Data S1 — In exploratory volatile collections, for each sample the contents of the sample, approach used, and GCMS peak areas for the three compounds of interest are listed. [file peerj-05-3957-s005.xlsx]

## Sheet: volatile collections data
															Approx. Retention Time & Peak Area from GCMS
							at the time of volatile collection, if known								10.92	24.61	28.46
b/bdf/df/G/c	Sample Name (date/no)	Sex	Space	Method	Collection Time (min)	Species	# Females	# Males	Male	Mature Female	Teneral Female	Diet	Fungus	Gallery present	quercivorol	2-Heneicosanone	2-Tricosanone	quercivorol y/n	2-heneicosanone y/n	2-tricosanone y/n
BDF	130919-03	male + female	Tube/Jar	SPME	0.666667	PSHB			y	y	y	y	y	n	120863	0	0	quercivorol	n.d.	n.d.
BDF	130919-04	male + female	Tube/Jar	SPME	1	PSHB			y	y	y	y	y	n	0	0	0	n.d.	n.d.	n.d.
BDF	130919-05	male + female	Tube/Jar	SPME	1	PSHB			y	y	y	y	y	n	0	0	0	n.d.	n.d.	n.d.
BDF	130919-06	female	Tube/Jar	SPME	1	PSHB			n	y	n	y	y	n	0	0	0	n.d.	n.d.	n.d.
B	131017-01	male	Tube/Jar	SPME	0.5	PSHB	0	6	y	n	n	n	n	n	0	0	0	n.d.	n.d.	n.d.
B	131018-03	male + female	Tube/Jar	SPME	60	PSHB	25	3	y	y	n	n	n	n	0	0	0	n.d.	n.d.	n.d.
B	131031-02	male + female	Tube/Jar	SPME	5	PSHB	30	6	y	y	n	n	n	n	0	0	0	n.d.	n.d.	n.d.
B	131101-01	male + female	Tube/Jar	Volatile Collection	1140	PSHB	30	6	y	y	n	n	n	n	0	0	0	n.d.	n.d.	n.d.
B	131104-01	male + female	Tube/Jar	Volatile Collection	960	PSHB	30	6	y	y	n	n	n	n	0	0	0	n.d.	n.d.	n.d.
B	131127-01	female	Tube/Jar	rinse/extract	0.1	PSHB	32	0	n	y	n	n	n	n	0	621231	810358	n.d.	2-heneicosanone	2-tricosanone
B	131211-01	female	Tube/Jar	rinse/extract	1440	PSHB	50	0	n	y	n	n	n	n	0	1375332	696222	n.d.	2-heneicosanone	2-tricosanone
B	131212-01	male	Tube/Jar	rinse/extract	2880	PSHB	0	4	y	n	n	n	n	n	0	1450097	930414	n.d.	2-heneicosanone	2-tricosanone
BDF	140114-03	male + female	Touch	SPME	0.1	PSHB	2	1	y	n	y	y	y	n	0	0	0	n.d.	n.d.	n.d.
BDF	140114-04	male + female	Touch	SPME	0.1	PSHB	1	1	y	n	y	y	y	n	0	0	0	n.d.	n.d.	n.d.
BDF	140114-05	male + female	Touch	SPME	0.1	PSHB	1	1	y	n	y	y	y	n	0	0	0	n.d.	n.d.	n.d.
G	140114-06	male + female	Gallery	SPME	0.1	PSHB	1	2	y	y	y	y	y	y	0	593012	1501260	n.d.	2-heneicosanone	2-tricosanone
DF	140115-01	neither	Gallery	SPME	0.1	PSHB	0	0	n	n	n	Y	Y	y	0	0	0	n.d.	n.d.	n.d.
G	140116-01	male + female	Gallery	rinse/extract		PSHB	26	2	y	y	y	y	y	y	0	0	712397	n.d.	2-heneicosanone	2-tricosanone
G	140115-05	male + female	Gallery	SPME		PSHB			y	y	y	y	y	y	0	828102	563396	n.d.	2-heneicosanone	2-tricosanone
BDF	140129-01	male + female	Tube/Jar	Volatile Collection	480	PSHB	15	1	y	y	y	y	y	n	1939850	0	0	quercivorol	n.d.	n.d.
DF	140131-01	neither	Tube/Jar	Volatile Collection	360	PSHB	0	0	n	n	n	y	y	n	148627	0	0	quercivorol	n.d.	n.d.
B	140131-02	female	Pipette	SPME	60	PSHB	1	0	n	y	n	n	n	n	0	5081387	3315340	n.d.	2-heneicosanone	2-tricosanone
B	140204-01	female	Pipette	SPME	40	PSHB	1	0	n	y	n	n	n	n	0	1546223	1380816	n.d.	2-heneicosanone	2-tricosanone
B	140204-02	female	Pipette	SPME	40	PSHB	1	0	n	n	y	n	n	n	0	240682	165819	n.d.	2-heneicosanone	2-tricosanone
control	140206-01	neither	Pipette	SPME	40		0	0	n	n	n	n	n	n	0	0	0	n.d.	n.d.	n.d.
B	140206-02	female	Pipette	SPME	40	PSHB	9	0	n	y	n	n	n	n	0	0	0	n.d.	n.d.	n.d.
B	140207-01	female	Pipette	SPME	80	PSHB	10	0	n	y	n	n	n	n	0	864750	725218	n.d.	2-heneicosanone	2-tricosanone
B	140207-02	male + female	Pipette	SPME	80	PSHB	4	1	y	n	y	n	n	n	0	658750	382642	n.d.	2-heneicosanone	2-tricosanone
B	140207-03	female	Pipette	SPME	50	PSHB	4	0	n	n	y	n	n	n	0	138302	0	n.d.	2-heneicosanone	n.d.
G	140210-01	male + female	Gallery	SPME	2	PSHB			y	y	y	y	y	y	0	90566	96583	n.d.	2-heneicosanone	2-tricosanone
B	140210-02	female	Pipette	Volatile Collection	3840	PSHB	4	0	n	y	n	n	n	n	0	159592	169857	n.d.	2-heneicosanone	2-tricosanone
control	140210-03	neither	Pipette	Volatile Collection	3840		0	0	n	n	n	n	n	n	0	0	0	n.d.	n.d.	n.d.
B	140210-04	female	Pipette	Volatile Collection	3840	PSHB	4	0	n	y	n	n	n	n	0	0	0	n.d.	n.d.	n.d.
control	140210-05	neither	Pipette	Volatile Collection	3840		0	0	n	n	n	n	n	n	0	0	0	n.d.	n.d.	n.d.
G	140212-01	male + female	Gallery	SPME	2	PSHB	3	2	y	y	y	y	y	y	0	1969393	2801817	n.d.	2-heneicosanone	2-tricosanone
BDF	140212-02	male	Pipette	SPME	195	PSHB	0	4	y	n	n	y	y	y	173569	3111095	3138901	quercivorol	2-heneicosanone	2-tricosanone
DF	140212-03 (#79)	neither	Pipette	SPME	30	PSHB	0	0	n	n	n	y	y	n	329093	0	0	quercivorol	n.d.	n.d.
control	140213-01	neither	Tube/Jar	SPME	120		0	0	n	n	n	n	n	n	0	0	0	n.d.	n.d.	n.d.
control	140213-02	neither	Tube/Jar	SPME	300		0	0	n	n	n	n	n	n	0	0	0	n.d.	n.d.	n.d.
BDF	140221-01	male	Pipette	SPME	60	PSHB	0	4	y	n	n	y	y	y	370461	0	0	quercivorol	n.d.	n.d.
BDF	140224-01	female	Pipette	SPME	60	PSHB	5	0	n	y	n	y	y	y	491348	0	0	quercivorol	n.d.	n.d.
DF	140224-02	neither	Pipette	SPME	90	PSHB	0	0	n	n	n	y	y	n	1676344	0	0	quercivorol	n.d.	n.d.
G	140228-02	female	Pipette	SPME	68	PSHB	4	0	n	y	n	y	y	y	0	1311016	737661	n.d.	2-heneicosanone	2-tricosanone
G	140303-02	male	Pipette	SPME	75	PSHB	0	4	y	n	n	y	y	y	0	594193	109879	n.d.	2-heneicosanone	2-tricosanone
DF	140303-03	neither	Pipette	SPME	75	PSHB	0	0	n	n	n	y	y	n	0	0	0	n.d.	n.d.	n.d.
G	140303-04	male + female	Gallery	SPME	1	PSHB	3	2	y	y	y	y	y	y	0	9554342	10835818	n.d.	2-heneicosanone	2-tricosanone
control	140303-05	neither	Pipette	SPME	75		0	0	n	n	n	n	n	n	0	0	0	n.d.	n.d.	n.d.
DF	140303-06	neither	Pipette	SPME	10	PSHB	0	0	n	n	n	y	y	n	0	0	0	n.d.	n.d.	n.d.
BDF	140307-02	male + female	Tube/Jar	Volatile Collection	480	PSHB	15	1	y	y	y	y	y	n	3026251	0	0	quercivorol	n.d.	n.d.
DF	140310-01	neither	Tube/Jar	SPME	90	PSHB	0	0	n	n	n	y	y	n	0	0	0	n.d.	n.d.	n.d.
DF	140310-02	neither	Tube/Jar	SPME	180	PSHB	0	0	n	n	n	y	y	n	0	0	0	n.d.	n.d.	n.d.
DF	140311-04	neither	Tube/Jar	SPME	1440	PSHB	0	0	n	n	n	y	y	n	0	0	0	n.d.	n.d.	n.d.
G	140313-01	male + female	Gallery	SPME	0.5	PSHB	8	0	n	n	n	y	y	y	0	695321	211134	n.d.	2-heneicosanone	2-tricosanone
G	140314-01	female	Gallery	SPME	1.5	PSHB	1	0	n	n	y	y	y	y	252077	2179876	833188	quercivorol	2-heneicosanone	2-tricosanone
BDF	140318-01	male + female	Tube/Jar	SPME	5	PSHB	40	8	y	y	y	y	y	y	0	0	0	n.d.	n.d.	n.d.
BDF	140319-01	male + female	Tube/Jar	SPME	105	PSHB	40	8	y	y	y	y	y	y	0	0	0	n.d.	n.d.	n.d.
G	140324-01	male + female	Gallery	SPME	1.5	PSHB	32	1	y	y	y	y	y	y	0	106843	70389	n.d.	2-heneicosanone	2-tricosanone
BDF	140324-02	male + female	Tube/Jar	Volatile Collection	300	PSHB	40	8	y	y	y	y	y	y	0	0	0	n.d.	n.d.	n.d.
control	140324-03	neither	Tube/Jar	Volatile Collection	300		0	0	n	n	n	n	n	n	0	0	0	n.d.	n.d.	n.d.
BDF	140325-01	female	Touch	SPME	0.1	PSHB	1	0	n	n	y	y	y	y	0	40505	0	n.d.	2-heneicosanone	n.d.
G	140325-02	male + female	Gallery	SPME	3	PSHB	19	2	y	y	y	y	y	y	0	126660	113041	n.d.	2-heneicosanone	2-tricosanone
G	140325-03	male + female	Gallery	SPME	2	PSHB	19	2	y	y	y	y	y	y	0	179549	0	n.d.	2-heneicosanone	n.d.
G	140327-01	male + female	Gallery	SPME	0.4	PSHB	2	2	y	y	y	y	y	y	0	670831	521566	n.d.	2-heneicosanone	2-tricosanone
G	140401-02	male + female	Gallery	SPME	3	PSHB	11	3	y	n	y	y	y	y	0	386559	13911	n.d.	2-heneicosanone	2-tricosanone
G	140401-03	male + female	Gallery	SPME	1.5	PSHB	11	3	y	y	y	y	y	y	0	240714	273186	n.d.	2-heneicosanone	2-tricosanone
G	140401-04	male + female	Gallery	SPME	0.1	PSHB	11	3	y	n	y	y	y	y	0	785196	983112	n.d.	2-heneicosanone	2-tricosanone
BDF	140402-05	male + female	Pipette	SPME	45	PSHB	1	5	y	n	y	y	y	y	0	0	0	n.d.	n.d.	n.d.
BDF	140505-03 TSHB	male	Pipette	SPME	10	TSHB	0	5	y	n	n	y	y	n	0	429536	79512	n.d.	2-heneicosanone	2-tricosanone
DF	140506-01 TSHB	neither	Pipette	SPME	10	TSHB	0	0	n	n	n	y	y	n	0	0	0	n.d.	n.d.	n.d.
G	140506-02 TSHB	male + female	Gallery	SPME	2	TSHB	55	5	y	y	y	y	y	y	0	12232160	2348846	n.d.	2-heneicosanone	2-tricosanone
B	140506-03 TSHB	female	Tube/Jar	SPME	1	TSHB	46	0	n	y	y	n	n	n	0	2996566		n.d.	2-heneicosanone
BDF	140506-05	male	Tube/Jar	Volatile Collection	1230	PSHB	0	15	y	n	n	y	y	y	0	0		n.d.	n.d.	n.d.
B	140506-07	female	Tube/Jar	SPME	90	PSHB	25	0	n	y	n	n	n	n	0	0	0	n.d.	n.d.	n.d.
B	140512-01	female	Pipette	Volatile Collection	8640	PSHB	15	0	n	y	y	y	y	n	0	0	0	n.d.	n.d.	n.d.
B	140514-01	female	Tube/Jar	SPME	1440	PSHB	25	0	n	y	n	n	n	n	0	9629472	6313342	n.d.	2-heneicosanone	2-tricosanone
control	140514-02	neither	Tube/Jar	SPME	1440		0	0	n	n	n	n	n	n	0	0	0	n.d.	n.d.	n.d.
B	140514-03	female	Tube/Jar	SPME	80	PSHB	25	0	n	y	n	n	n	n	0	0	0	n.d.	n.d.	n.d.
control	140515-01	neither	Tube/Jar	SPME	80		0	0	n	n	n	n	n	n	0	0	0	n.d.	n.d.	n.d.
control	131212-02	neither	none	none	0		0	0	n	n	n	n	n	n	0	0	0	n.d.	n.d.	n.d.
D	150513-01	neither	Pipette	SPME	70		0	0	n	n	n	y	n	n	0	0	0	n.d.	n.d.	n.d.
D	150514-02	neither	Pipette	SPME	1120		0	0	n	n	n	y	n	n	0	0	0	n.d.	n.d.	n.d.
D	141106-02	neither	Tube/Jar	SPME	960		0	0	n	n	n	y	n	n	0	0	0	n.d.	n.d.	n.d.
